# Supplementary material for: Sustainable one-pot preparation of fully crystalline shaped zeolite catalysts
Source: Royal Society of Chemistry journal article supplement (doi:10.1039/d1cy00948f), 2021-01-01
Supplement: d1cy00948f1.pdf [file d1cy00948f1.pdf]

## Supplementary Information

### Sustainable one-pot preparation of full-crystalline and shaped zeolites catalysts

Huimin Luan,<sup>a</sup> Chi Lei,<sup>a</sup> Qinming Wu,<sup>b\*</sup> Na Sheng,<sup>c</sup> Yeqing Wang,<sup>a</sup> Xiangju Meng<sup>a</sup>  
and Feng-Shou Xiao<sup>b\*</sup>

<sup>a</sup> Key Laboratory of Applied Chemistry of Zhejiang Province, Department of Chemistry, Zhejiang University, Hangzhou 310028, China.

<sup>b</sup> College of Chemical and Biological Engineering, Zhejiang University, Hangzhou 310027, China.

<sup>c</sup> Zhejiang Henglan Science & Technology Co., Ltd, Zhejiang Hengyi Group Co., Ltd, Hangzhou 310027, China.

\* Corresponding author. E-mail: qinmingwu@zju.edu.cn; fsxiao@zju.edu.cn

## **Experimental**

### **Synthesis of shaped silicalite-1 zeolite extrudate/pellets**

3.8 g of  $\text{Na}_2\text{SiO}_3 \cdot 9\text{H}_2\text{O}$ , 7.5 g of the silica gel, and 1.5 g of silicalite-1 zeolite seeds were mixed and ground for 5 min, followed by addition of 24 g of colloidal silica (31.5 wt%  $\text{SiO}_2$  in water) to form a mixture, which was used for shaping. Then, the resultant extrudates and pellets were dried at 50 °C for 10 h and calcined at 550 °C for 4 h, which was used as a starting solid silica for the preparation of the shaped silicalite-1 zeolite.

As a typical run, 0.88 g of the shaped silica extrudate/pellet, 0.06 g of  $\text{H}_2\text{O}$ , and 0.99 g of ethanol were put into a Teflon-lined autoclave and sealed, then crystallized at 180 °C for 4 d at static condition. The final products were obtained by filtering, washing with deionized water, and subsequently drying overnight at 100 °C.  $\text{Na}^+$  in the product was removed by exchanging with HCl solution.

### **Synthesis of shaped MTT zeolite extrudates**

As a typical run, 1.309 g of  $\text{NaAlO}_2$  was dissolved in 3.0 g of  $\text{H}_2\text{O}$ , then added into 63 g of colloidal silica (31.5 wt%  $\text{SiO}_2$  in water) under stirring conditions. After stirring for another 2 h, the mixture was heated in an oven at 150 °C for 12 h to evaporate the water to obtain the aluminosilicate precursor. Furthermore, 2.4 g of  $\text{Na}_2\text{SiO}_3 \cdot 9\text{H}_2\text{O}$ , 3.75 g of the aluminosilicate precursor, and 0.75 g of MTT zeolite seeds were mixed and ground for 5 min, followed by the addition of 12 g of colloidal silica (31.5 wt%  $\text{SiO}_2$  in water) to form a mixture, which was used for shaping. Then, the resulting extrudates and pellets were dried at 50 °C for 10 h and calcined at 550 °C for 4 h, which was used as the starting aluminosilicate solids for the preparation of the shaped MTT zeolite catalyst. Finally, 0.88 g of the shaped aluminosilicate extrudate, 0.14 g of  $\text{H}_2\text{O}$  and 0.99 g of ethanol were put into a Teflon-lined autoclave and sealed, then crystallized at 140 °C for 6 d at static condition. After filtering, washing with deionized water, and subsequently drying overnight at 100 °C, and removing  $\text{Na}^+$  in the product by exchanging with HCl solution, it was obtained the shaped MTT zeolite extrudate.

### **Synthesis of shaped TON zeolite extrudates**

As a typical run, 1.309 g of  $\text{NaAlO}_2$  was dissolved in 3.0 g of  $\text{H}_2\text{O}$ , then added into 63 g of colloidal silica (31.5 wt%  $\text{SiO}_2$  in water) under stirring conditions. After stirring for another 2 h, the mixture was heated in an oven at 150 °C for 12 h to evaporate the water to obtain the aluminosilicate precursor. Furthermore, 3 g of  $\text{Na}_2\text{SiO}_3 \cdot 9\text{H}_2\text{O}$ , 3.75 g of the aluminosilicate precursor, and 0.75 g of TON seeds were mixed and ground for 5 min, followed by the addition of 12 g of colloidal silica (31.5 wt%  $\text{SiO}_2$  in water) to form a mixture, which was used for shaping. Then the resulting extrudates and pellets were dried at 50 °C for 10 h and calcined at 550 °C for 4 h, which was used as the starting solid material for the preparation of the shaped TON zeolite catalyst. Finally, 0.88 g of shaped aluminosilicate extrudate, 0.14 g of  $\text{H}_2\text{O}$  and 0.99 g of methanol were put into a Teflon-lined autoclave and sealed, then crystallized at 140 °C for 6 d at static condition. The final products were obtained by filtering, washing with deionized water, and subsequently drying overnight at 100 °C.  $\text{Na}^+$  in the product was removed by exchanging with HCl solution, it was obtained the shaped TON zeolite extrudate.

### **Synthesis of conventional shaped ZSM-5 zeolite**

In a typical run for synthesis of conventional shaped aluminosilicate ZSM-5 zeolite, 0.0218 g of isopropyl alcohol aluminum and 4.875 g of TPAOH (40 wt%) were added to 5.1 g of  $\text{H}_2\text{O}$ , resulting in a clear solution. After addition of 4.2 g of TEOS, a mixture was formed. After stirring for 6 h, the mixture was transferred into an autoclave and heated at 200 °C for 48 h. The final products were obtained by filtering, washing with deionized water, subsequently drying overnight at 100 °C, and calcined at 550 °C for 4 h. Then ZSM-5 zeolite and silica binder were mixed for preparation of conventional shaped ZSM-5 catalyst.

## Supplementary Figures & Table Captions

**Fig. S1.** Photograph of the shaped aluminosilicate extrudate before crystallization.

**Fig. S2.** SEM images of the shaped aluminosilicate extrudate before crystallization.

**Fig. S3.** XRD patterns of the shaped aluminosilicate extrudate (a) before and (b) after crystallization.

**Fig. S4.** N<sub>2</sub> sorption isotherms of the shaped aluminosilicate extrudate before crystallization.

**Fig. S5.** <sup>29</sup>Si MAS NMR spectrum of the shaped aluminosilicate extrudate before crystallization: experimental curve (solid line) and deconvoluted curves (dotted lines).

**Fig. S6.** <sup>29</sup>Si MAS NMR spectra of the conventional shaped ZSM-5 zeolite catalyst: experimental curve (solid line), deconvoluted curves (dotted lines).

**Fig. S7.** XRD patterns of the full-crystalline and shaped ZSM-5 zeolite extrudates with different Si/Al ratios of (a) 37, (b) 118, (c) 151, (d) 240, and (e) 317, respectively.

**Fig. S8.** Photographs of the full-crystalline and shaped ZSM-5 zeolite pellets (a) before and (b) after crystallization.

**Fig. S9.** SEM images of the full-crystalline and shaped ZSM-5 zeolite pellet.

**Fig. S10.** XRD pattern of the full-crystalline and shaped ZSM-5 zeolite pellet.

**Fig. S11.** XRD pattern of the full-crystalline and shaped silicalite-1 zeolite extrudate.

**Fig. S12.** SEM images of the full-crystalline and shaped silicalite-1 zeolite extrudate.

**Fig. S13.** XRD pattern of the full-crystalline and shaped silicalite-1 zeolite pellet.

**Fig. S14.** SEM images of the full-crystalline and shaped silicalite-1 zeolite pellet.

**Fig. S15.** Methanol conversion and product selectivities over the shaped aluminosilicate extrudate before crystallization at 480 °C (◆, Conv.; ■, C<sub>2</sub><sup>=</sup>; ●, C<sub>3</sub><sup>=</sup>; ▲, C<sub>4</sub><sup>=</sup>; ▼, C<sub>5</sub><sup>+</sup>).

**Fig. S16.** Methanol conversion and product selectivities over the conventional shaped ZSM-5 zeolite catalyst at 480 °C (◆, Conv.; ■, C<sub>2</sub><sup>=</sup>; ●, C<sub>3</sub><sup>=</sup>; ▲, C<sub>4</sub><sup>=</sup>; ▼, C<sub>5</sub><sup>+</sup>).

**Fig. S17.** XRD pattern of the conventional shaped ZSM-5 zeolite catalyst.

**Fig. S18.** N<sub>2</sub> sorption of the conventional shaped ZSM-5 zeolite catalyst.

**Fig. S19.** Schematic representation of the formation of core-shell structures.

**Fig. S20.** Al2p XPS spectra of full-crystalline and shaped ZSM-5 zeolite catalysts by parallel tests for five times (a-e).

**Table S1.** Mechanical strength tests for 100 shaped ZSM-5 extrudates.

**Table S2.** <sup>29</sup>Si MAS NMR data of the shaped extrudates.

**Table S3.** Si/Al ratios of the shaped aluminosilicate extrudates and the ZSM-5 zeolite catalysts.

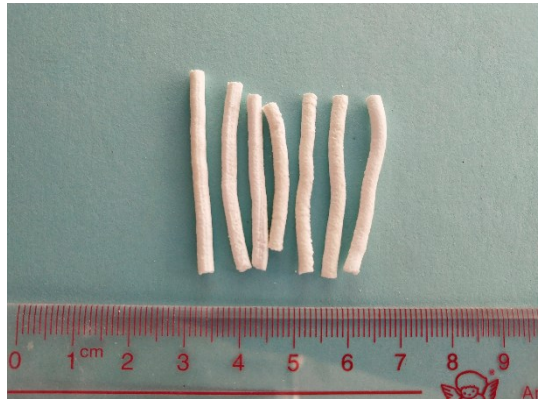

Fig. S1. Photograph of the shaped aluminosilicate extrudate before crystallization.

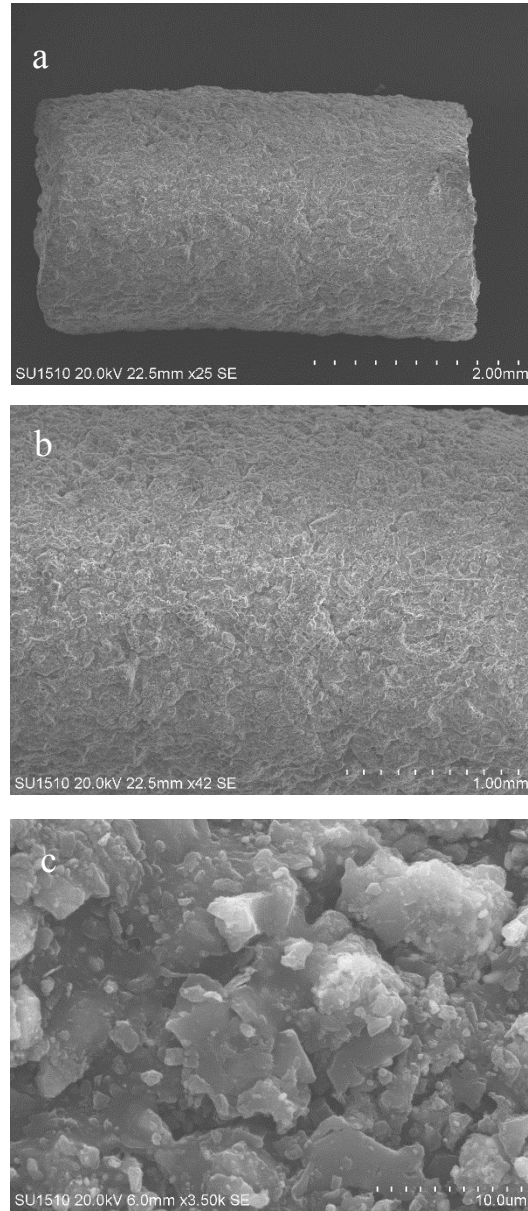

Fig. S2. SEM images of the shaped aluminosilicate extrudate before crystallization.

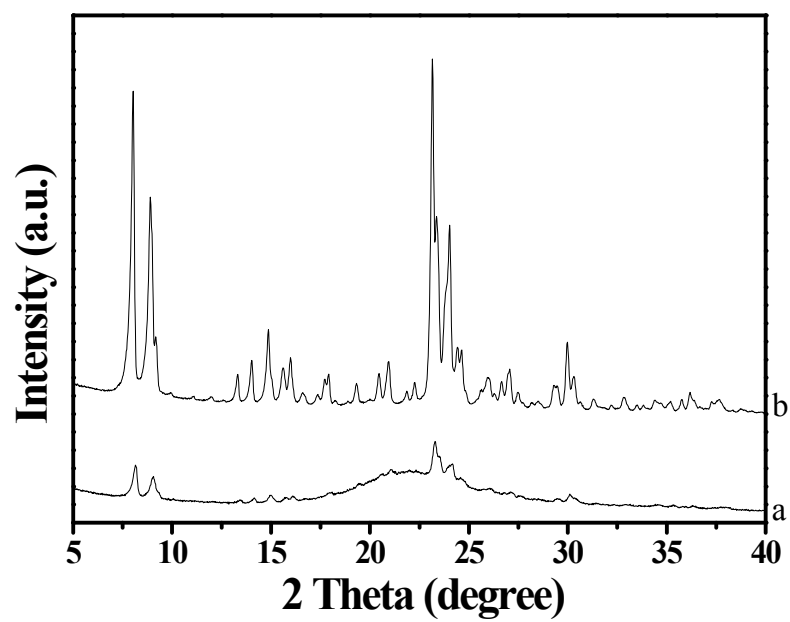

Fig. S3. XRD patterns of the shaped aluminosilicate extrudate (a) before and (b) after crystallization.



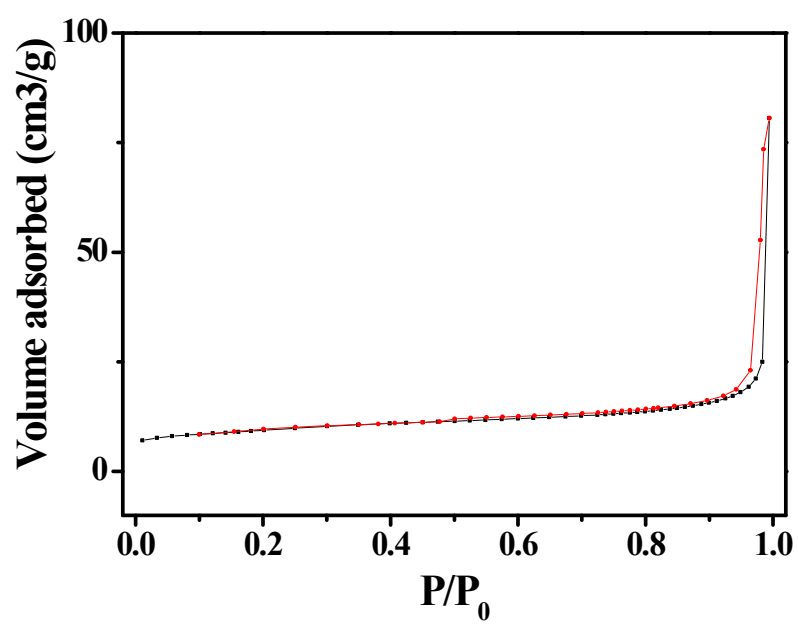

Fig. S4. N<sub>2</sub> sorption isotherms of the shaped aluminosilicate extrudate before crystallization.

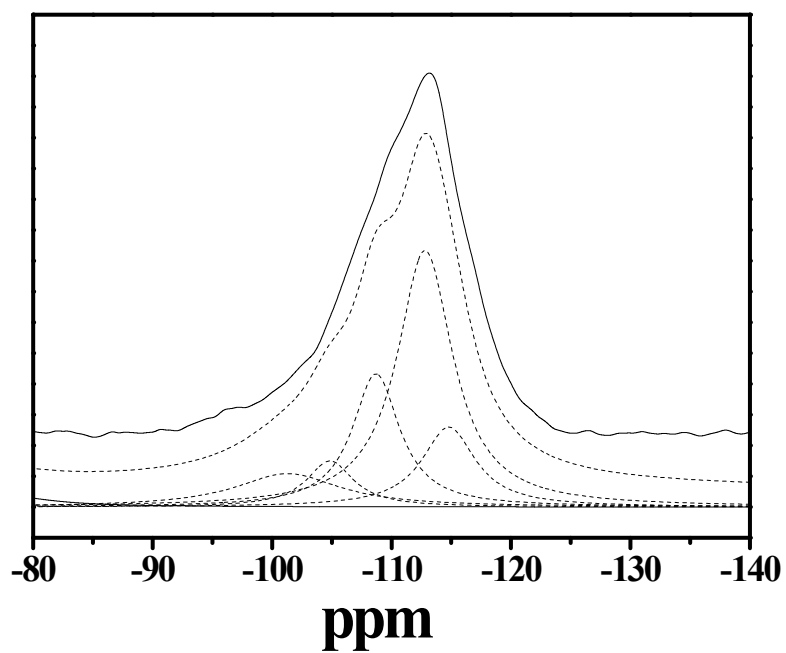

Fig. S5.  $^{29}\text{Si}$  MAS NMR spectrum of the shaped aluminosilicate extrudate before crystallization: experimental curve (solid line) and deconvoluted curves (dotted lines).

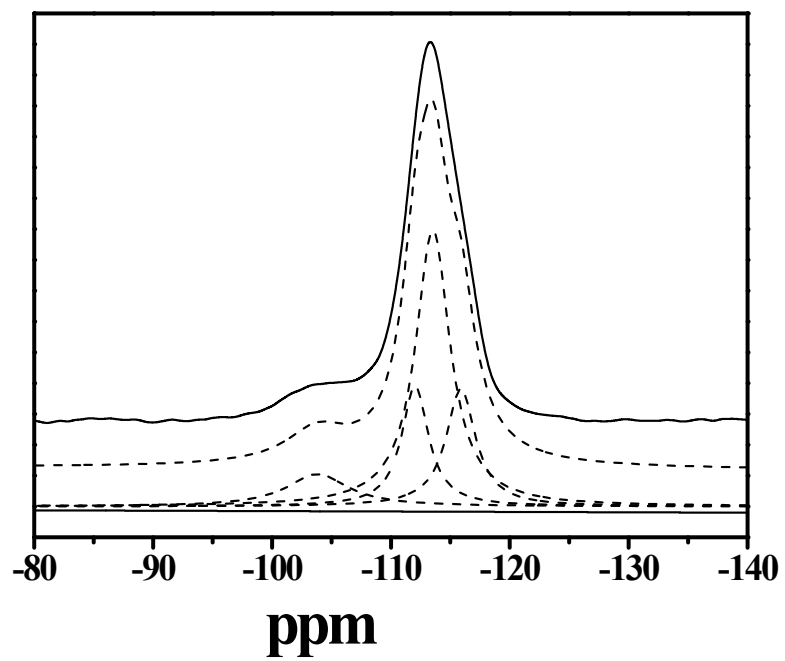

Fig. S6.  $^{29}\text{Si}$  MAS NMR spectrum of the conventional shaped ZSM-5 zeolite catalyst: experimental curve (solid line) and deconvoluted curves (dotted lines).

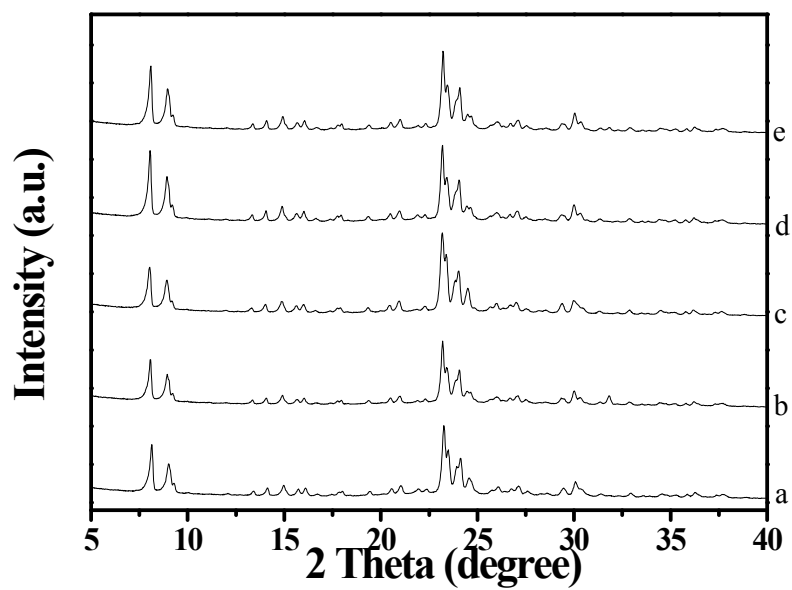

Fig. S7. XRD patterns of the full-crystalline and shaped ZSM-5 zeolite extrudates with different Si/Al ratios of (a) 37, (b) 118, (c) 151, (d) 240, and (e) 317, respectively.

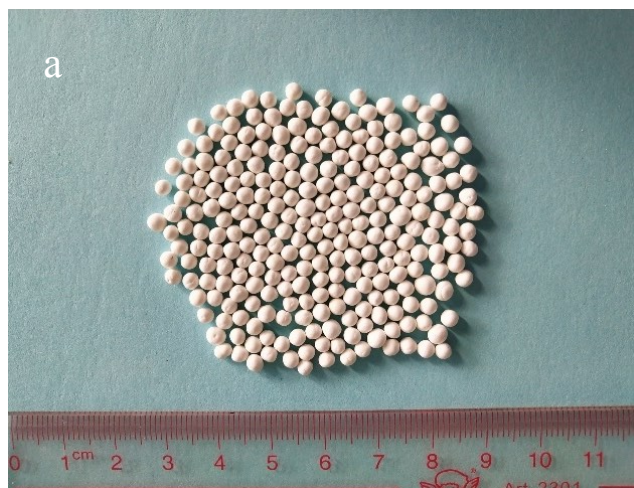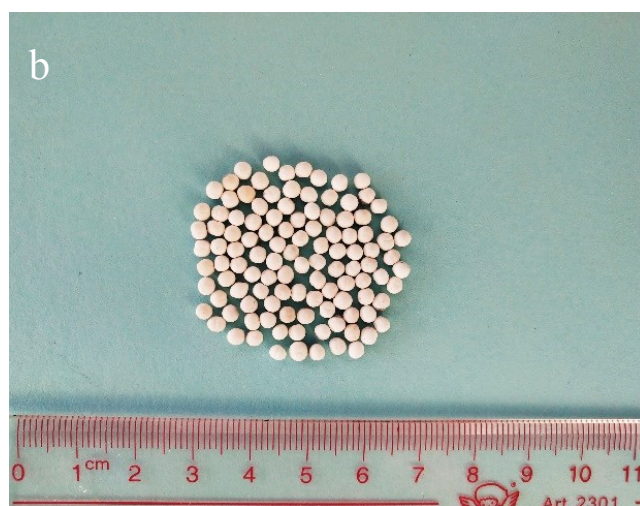

Fig. S8. Photographs of the full-crystalline and shaped ZSM-5 zeolite pellets (a) before and (b) after crystallization.

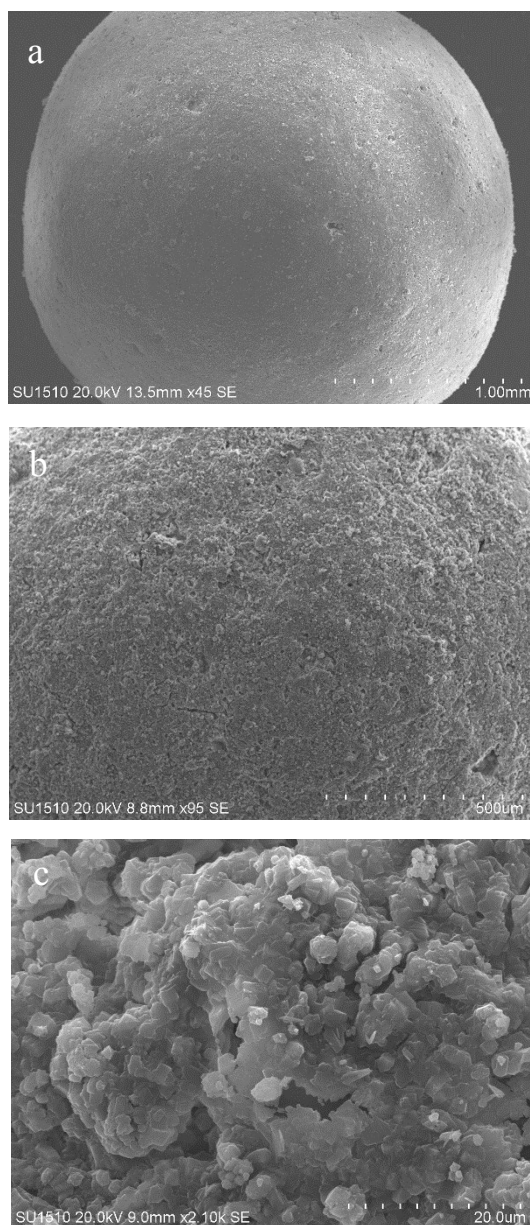

Fig. S9. SEM images of the full-crystalline and shaped ZSM-5 zeolite pellet.

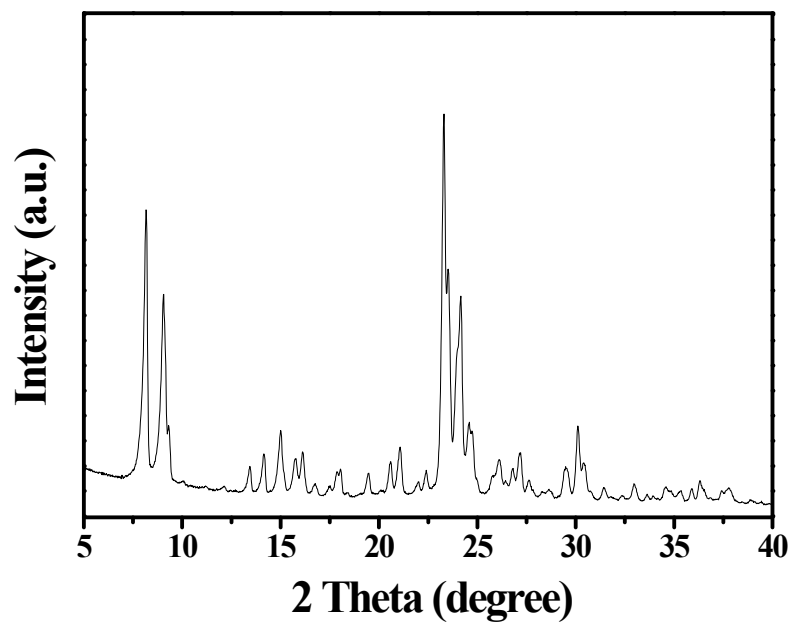

Fig. S10. XRD pattern of the full-crystalline and shaped ZSM-5 zeolite pellet.

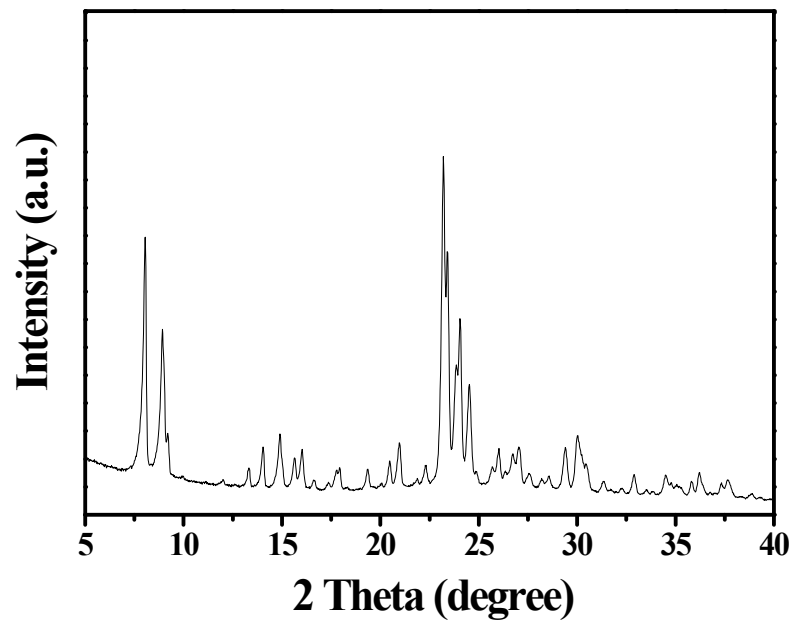

Fig. S11. XRD pattern of the full-crystalline and shaped silicalite-1 zeolite extrudate.



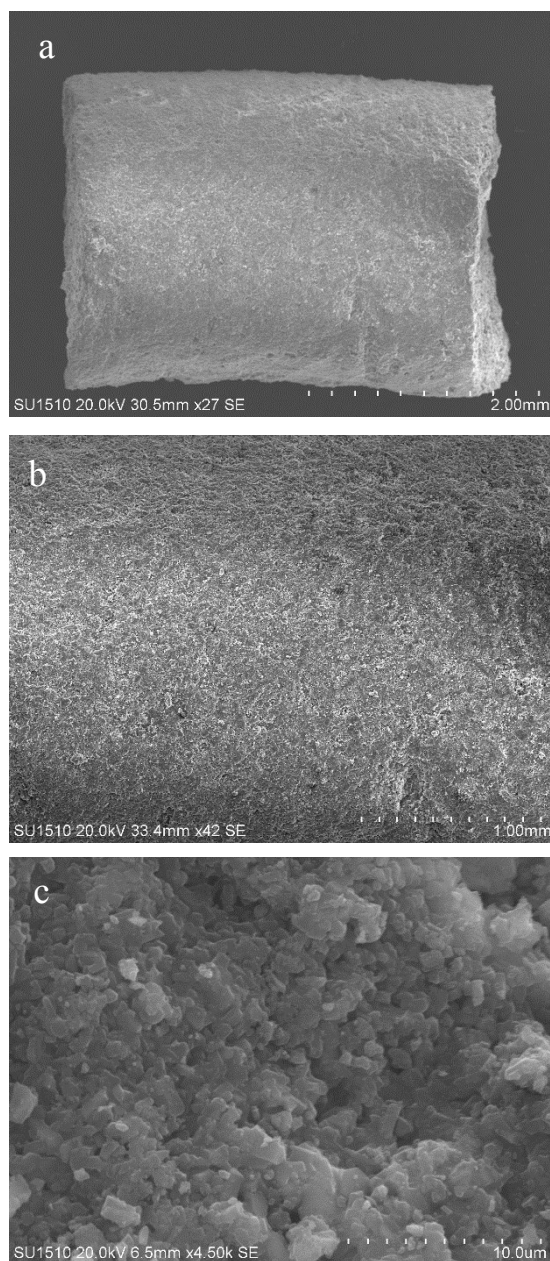

Fig. S12. SEM images of the full-crystalline and shaped silicalite-1 zeolite extrudate.

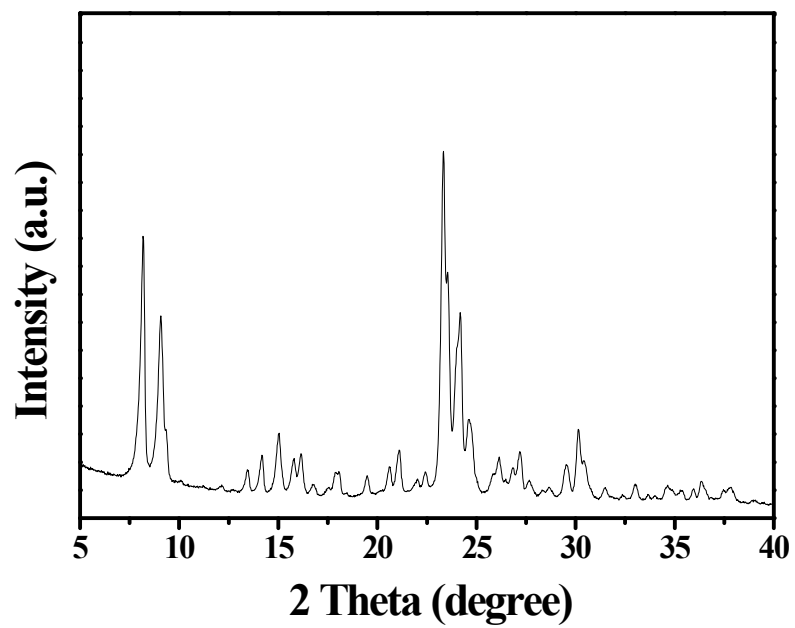

Fig. S13. XRD pattern of the full-crystalline and shaped silicalite-1 zeolite pellet.

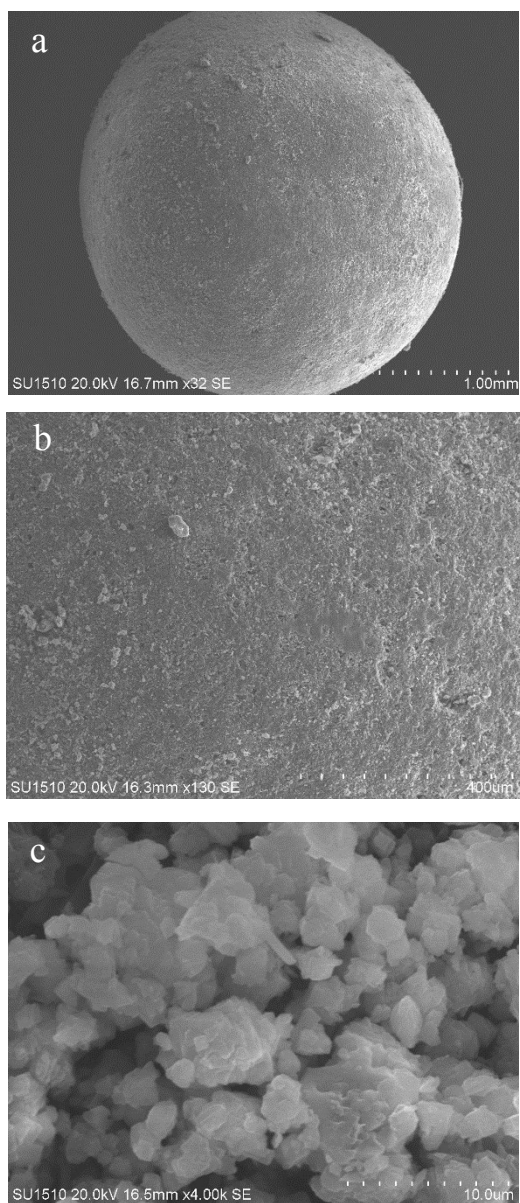

Fig. S14. SEM images of the full-crystalline and shaped silicalite-1 zeolite pellet.

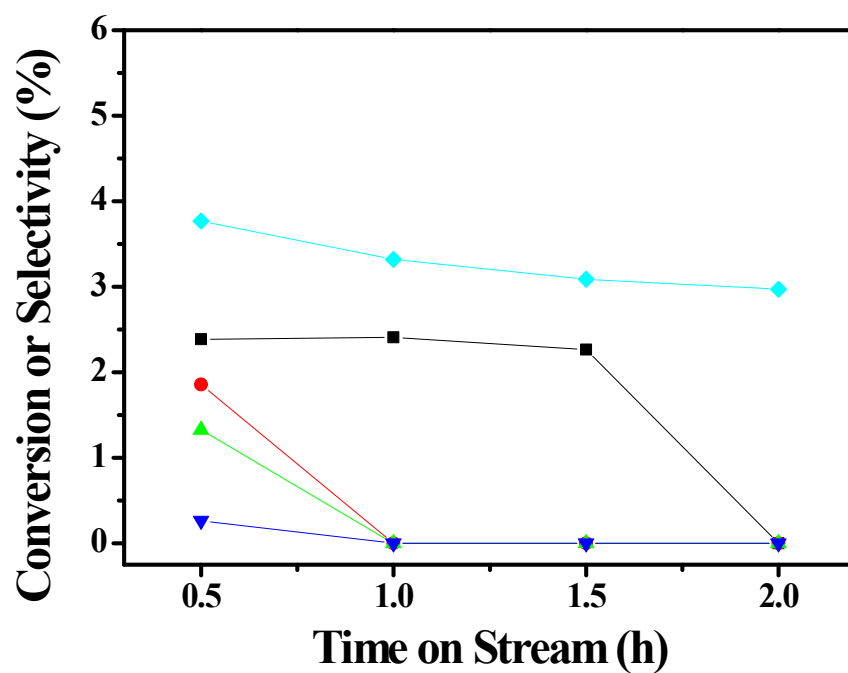

**Fig. S15.** Methanol conversion and product selectivities over the shaped aluminosilicate extrudate before crystallization at 480 °C (◆, Conv.; ■, C<sub>2</sub><sup>-</sup>; ●, C<sub>3</sub><sup>-</sup>; ▲, C<sub>4</sub><sup>-</sup>; ▼, C<sub>5</sub><sup>+</sup>).

**Note:** Before crystallization, the shaped aluminosilicate extrudate is almost inactive.

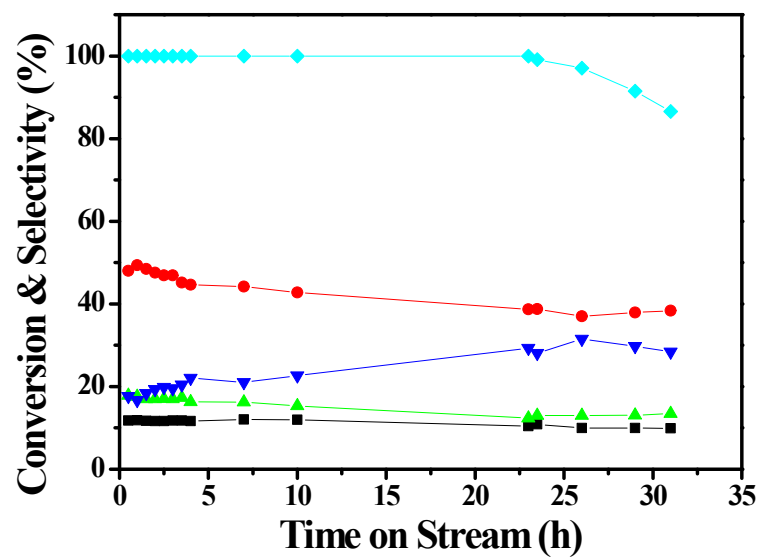

**Fig. S16.** Methanol conversion and product selectivities over the conventional shaped ZSM-5 zeolite catalyst at 480 °C (◆, Conv.; ■, C<sub>2</sub><sup>-</sup>; ●, C<sub>3</sub><sup>-</sup>; ▲, C<sub>4</sub><sup>-</sup>; ▼, C<sub>5</sub><sup>+</sup>).

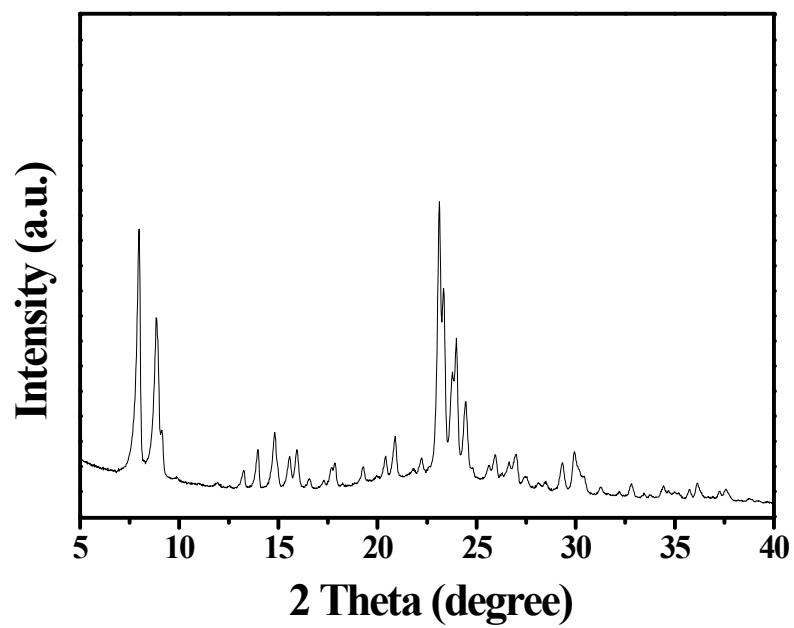

Fig. S17. XRD pattern of the conventional shaped ZSM-5 zeolite catalyst.

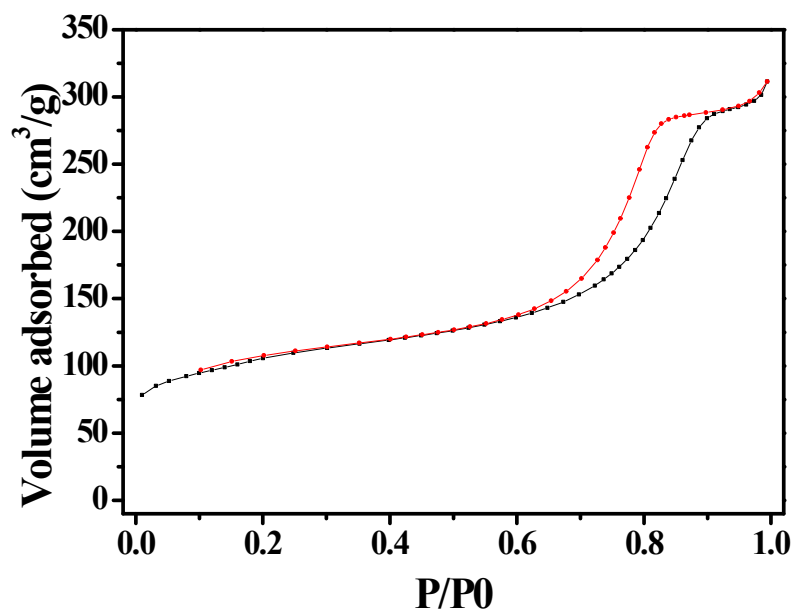

Fig. S18. N<sub>2</sub> sorption of the conventional shaped ZSM-5 zeolite catalyst.

**Note:** The BET surface area and micropore volume are 368 m<sup>2</sup>/g and 0.059 cm<sup>3</sup>/g.

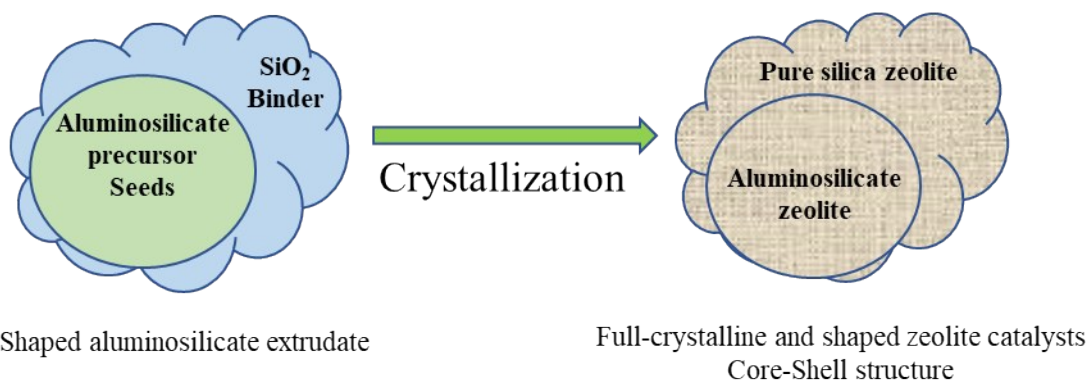

Fig. S19. Schematic representation of the formation of core-shell structures.

**Note:** After full crystallization of the extrudate, the colloidal silica was transformed into the pure silica zeolite shell, while the aluminosilicate precursor nanoparticles were transformed into the aluminosilicate zeolite core, which formed a “core-shell structure”.



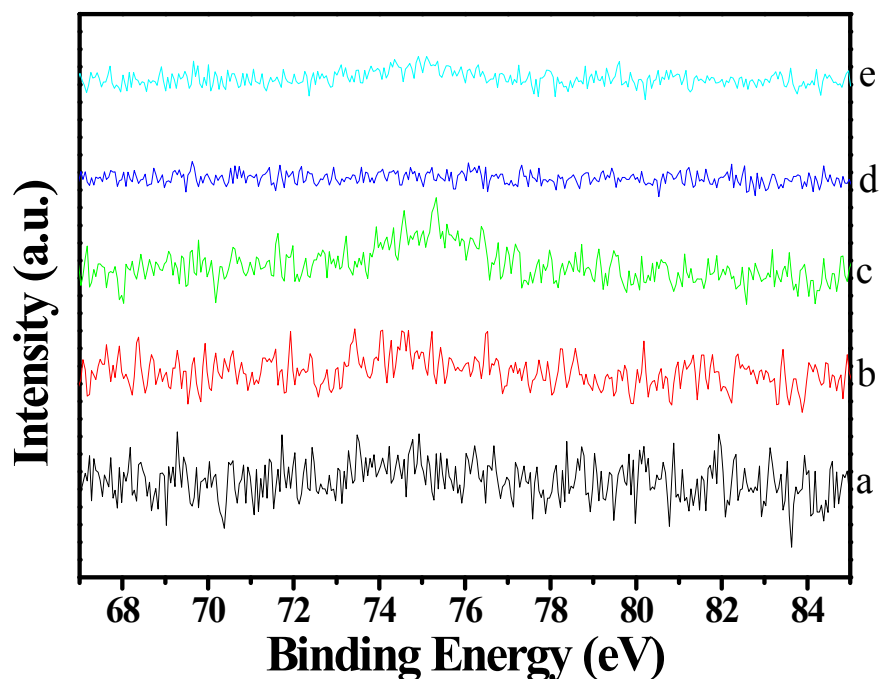

Fig. S20. Al<sub>2</sub>p XPS spectra of full-crystalline and shaped ZSM-5 zeolite catalysts by parallel tests for five times (a-e).

Note: Because XPS is a surface technique, it is reasonable to measure the surface composition of the samples. During these measurements, the Al signal in the sample d was undetectable, and the Al signals in the other samples were very weak, which are in good agreement with the proposed “core-shell structure”, where core structure is aluminosilicate zeolite and shell structure is pure silica zeolite transformed from inorganic binder of colloidal silica.

Table S1. Mechanical strength tests for 100 shaped ZSM-5 extrudates.

| 20-30 N     | 30-40 N     | 40-50 N     | 50-60 N     | >60 N       |
|-------------|-------------|-------------|-------------|-------------|
| 24.3, 20.0, | 38.7, 34.0, | 45.4, 46.3, | 50.2, 52.0, | 60.1, 60.7, |
| 28.2, 26.0, | 39.5, 38.1, | 43.0, 48.0, | 51.5, 50.5, | 66.0, 62.0, |
| 27.3, 27.2, | 37.2, 39.2, | 41.9, 43.0, | 51.0, 58.9, | 63.0, 60.0, |
| 22.2, 27.0, | 36.6, 38.4, | 40.0, 44.0, | 52.7, 51.8, | 71.0, 61.2  |
| 24.5, 29.6, | 36.9, 35.0, | 46.3, 48.1, | 52.0, 54.0, |             |
| 21.6        | 37.0, 36.0, | 48.4, 47.8, | 53.1, 50.0, |             |
|             | 32.3, 33.0, | 42.3, 44.7, | 52.0, 58.0, |             |
|             | 31.0, 34.2, | 47.0, 44.7, | 56.0, 57.0, |             |
|             | 30.0, 31.0, | 48.2, 45.2, | 50.0, 50.7, |             |
|             | 38.0, 30.1, | 42.0, 44.4, | 52.0, 51.6, |             |
|             | 38.8, 36.9, | 40.0, 46.8, | 50.1        |             |
|             | 35.2, 36,   | 41.0, 40.0, |             |             |
|             | 35          | 47.1, 44.3, |             |             |
|             |             | 49.0, 43.3, |             |             |
|             |             | 46.0, 48.1, |             |             |
|             |             | 40.3, 46.3, |             |             |
|             |             | 40.0, 43.8, |             |             |
|             |             | 43.8        |             |             |

Table S2.  $^{29}\text{Si}$  MAS NMR data of the shaped extrudates.

| Sample                                                | Si(0Al) (%) | Si(0Al) (%) | Si(0Al) (%) | Si(1Al) (%) |
|-------------------------------------------------------|-------------|-------------|-------------|-------------|
| Full-crystalline and shaped<br>ZSM-5 zeolite catalyst | 11          | 36          | 49          | 4           |
| Shaped aluminosilicate<br>extrudate                   | 14          | 47          | 21          | 18          |
| Conventional shaped ZSM-5<br>zeolite catalyst         | 20          | 52          | 18          | 10          |

Table S3. Si/Al ratios of the shaped aluminosilicate extrudates and the ZSM-5 zeolite catalysts.

| Run | Si/Al ratios of aluminosilicate precursors | Si/Al ratios of the shaped aluminosilicate extrudates | Si/Al ratios of the shaped ZSM-5 zeolite catalysts |
|-----|--------------------------------------------|-------------------------------------------------------|----------------------------------------------------|
| 1   | 17                                         | 28                                                    | 37                                                 |
| 2   | 50                                         | 107                                                   | 118                                                |
| 3   | 80                                         | 134                                                   | 151                                                |
| 4   | 132                                        | 202                                                   | 240                                                |
| 5   | 234                                        | 272                                                   | 317                                                |
